# Supplementary material for: Homogeneous assays for aptamer-based ethanolamine sensing: no indication of target binding
Source: Royal Society of Chemistry journal article supplement (doi:10.1039/d2an00145d), 2022-01-01
Supplement: d2an00145d1.pdf [file d2an00145d1.pdf]

**Electronic supplementary information**

**Homogeneous assays for aptamer-based ethanolamine sensing: no indication of  
target binding**

Yuzhe Ding, Xun Liu, Po-Jung Jimmy Huang and Juewen Liu\*

Department of Chemistry, Waterloo Institute for Nanotechnology, University of Waterloo,

Waterloo, Ontario, N2L 3G1, Canada

Email: liujw@uwaterloo.ca

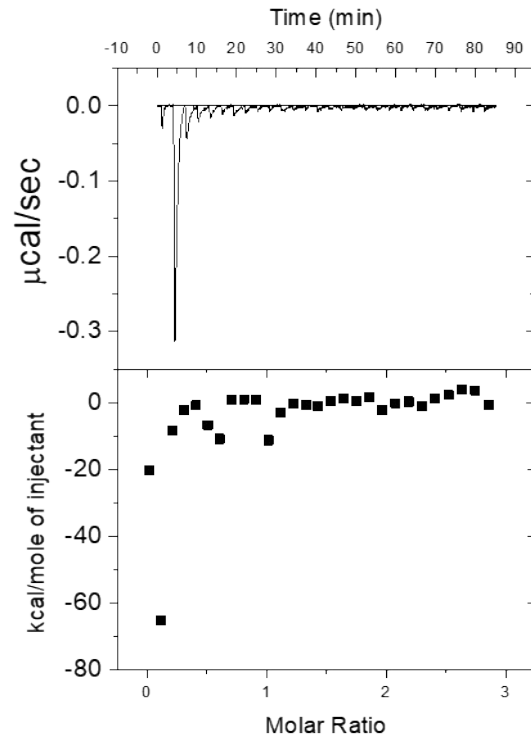

**Figure S1.** ITC data of titrating 28.6  $\mu\text{M}$  complementary DNA (C-EA-ConsT) into 2  $\mu\text{M}$  EA-ConsT.

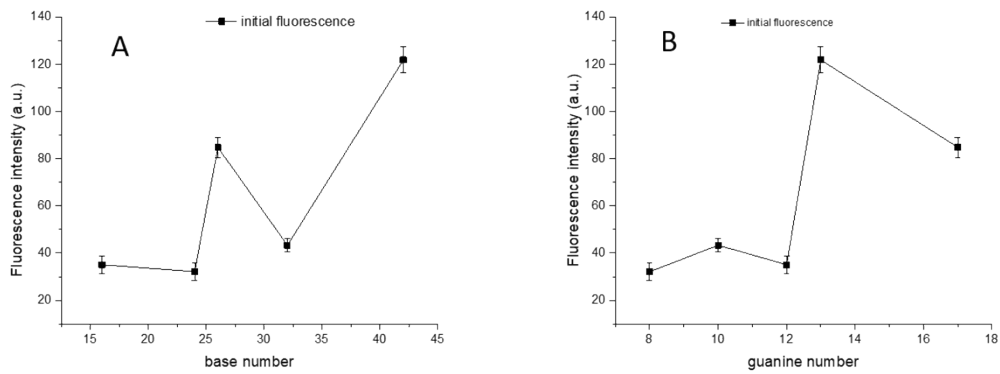

**Figure S2.** (A) The initial ThT fluorescence as a function of DNA length. (B) The initial ThT fluorescence as a function of guanine nucleotide number.

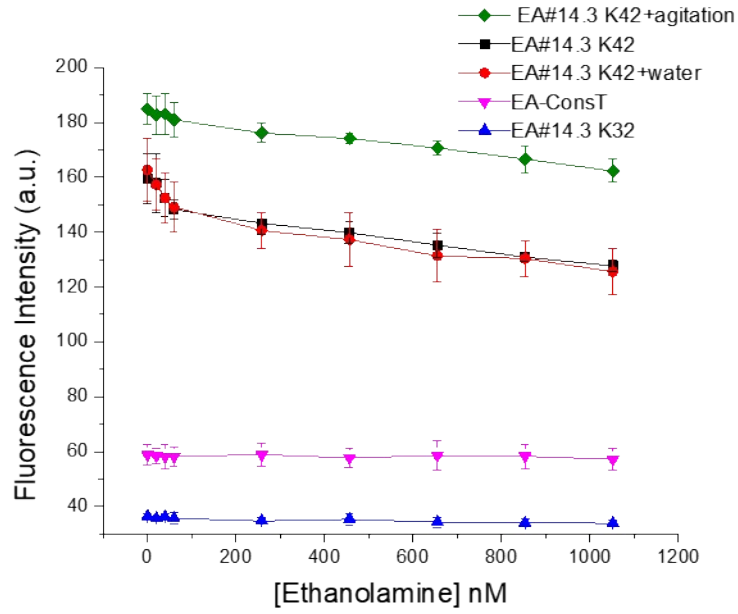

**Figure S3.** ThT fluorescence intensity at 490 nm from ThT/aptamer samples in the presence of different concentrations of ethanolamine up to 1  $\mu$ M. The line 14.3K42+agitation means shaking the cuvette without adding anything into the system, which showed same trends as 14.3K42 and 14.3K42 + water.
